# Supplementary material for: A randomized, placebo‐controlled, phase 1/2 study of tivantinib (ARQ 197) in combination with irinotecan and cetuximab in patients with metastatic colorectal cancer with wild‐type KRAS who have received first‐line systemic therapy
Source: PubMed Central journal article supplement — Int J Cancer. 2016 Mar 22;139(1):177–86. doi: 10.1002/ijc.30049 (PMC5071720; doi:10.1002/ijc.30049), 2016-03-22
Supplement: IJC-139-177-s001.pdf [file IJC-139-177-s001.pdf]

**A randomized, placebo-controlled, phase 1/2 study of tivantinib (ARQ 197) in combination with irinotecan and cetuximab in patients with metastatic colorectal cancer with wild-type *KRAS* who have received first-line systemic therapy**

Cathy Eng, Alberto Bessudo, Lowell L. Hart, Aleksey Severtsev, Oleg Gladkov, Lothar Müller, Mikhail V. Kopp, Vladimir Vladimirov, Robert Langdon, Bogdan Kotiv, Sandro Barni, Ching Hsu, Ellen Bolotin, Reinhard von Roemeling, Brian Schwartz, and Johanna C. Bendell

**SUPPLEMENTARY MATERIAL**

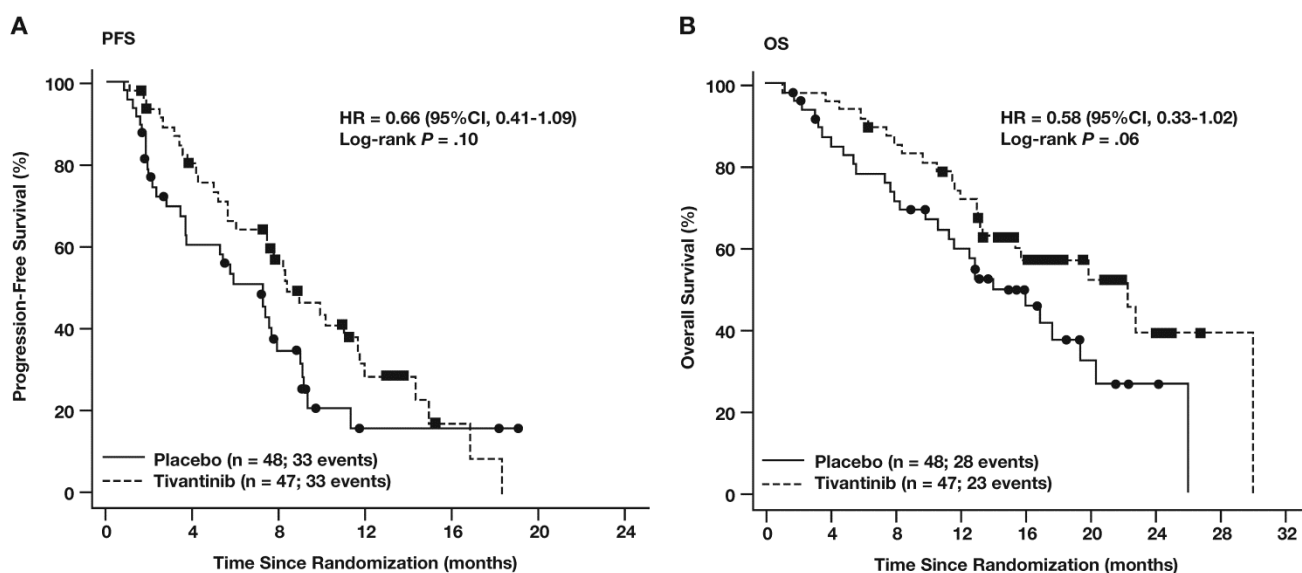

**Supplementary Figure 1.** (A) Progression-free survival and (B) overall survival in patients with prior oxaliplatin therapy by study treatment group. Abbreviations: CI: confidence interval; HR: hazard ratio.

**Supplementary Table 1.** Summary of FACT-C scores during phase 2 of study (QOL analysis set)

|                                   | Tivantinib<br>( <i>n</i> = 59) |       |       | Placebo<br>( <i>n</i> = 52) |       |       |
|-----------------------------------|--------------------------------|-------|-------|-----------------------------|-------|-------|
|                                   | <i>n</i>                       | Score |       | <i>n</i>                    | Score |       |
|                                   |                                | Mean  | SD    |                             | Mean  | SD    |
| <b>Colorectal cancer subscale</b> |                                |       |       |                             |       |       |
| Baseline                          | 59                             | 18.8  | 4.46  | 52                          | 18.8  | 4.46  |
| Cycle 3 Day 1                     | 43                             | 18.8  | 5.01  | 35                          | 18.6  | 4.63  |
| Change from baseline              |                                | -0.8  | 3.76  |                             | -0.1  | 3.98  |
| End of treatment                  | 32                             | 17.6  | 5.84  | 23                          | 17.5  | 5.57  |
| Change from baseline              |                                | -0.7  | 5.27  |                             | -1.0  | 4.06  |
| <b>Trial outcome index</b>        |                                |       |       |                             |       |       |
| Baseline                          | 59                             | 56.4  | 13.00 | 52                          | 55.2  | 11.60 |
| Cycle 3 Day 1                     | 43                             | 55.8  | 14.44 | 35                          | 56.2  | 11.29 |
| Change from baseline              |                                | -2.7  | 8.24  |                             | -0.2  | 8.34  |
| End of treatment                  | 32                             | 53.3  | 15.80 | 23                          | 49.2  | 18.31 |
| Change from baseline              |                                | -2.9  | 12.78 |                             | -4.7  | 12.04 |
| <b>Total</b>                      |                                |       |       |                             |       |       |
| Baseline                          | 59                             | 94.3  | 18.29 | 52                          | 93.8  | 17.32 |
| Cycle 3 Day 1                     | 43                             | 96.2  | 19.68 | 35                          | 95.5  | 16.75 |
| Change from baseline              |                                | -1.1  | 10.88 |                             | 0.7   | 12.43 |
| End of treatment                  | 32                             | 90.9  | 21.79 | 23                          | 87.5  | 26.63 |
| Change from baseline              |                                | -3.1  | 15.70 |                             | -4.5  | 16.58 |

Abbreviations: FACT-C: Functional Assessment of Cancer Therapy-Colorectal; QOL: quality of life; SD: standard deviation.
